# Supplementary material for: Cardiac Stem Cell Secretome Protects Cardiomyocytes from Hypoxic Injury Partly via Monocyte Chemotactic Protein-1-Dependent Mechanism
Source: Int J Mol Sci. 2016 May 24;17(6):800. doi: 10.3390/ijms17060800 (PMC4926334; doi:10.3390/ijms17060800)
Supplement: Supplementary file 1 [file ijms-17-00800-s001.pdf]

# Supplementary Materials: Cardiac Stem Cell Secretome Protects Cardiomyocytes from Hypoxic Injury Partly via Monocyte Chemotactic Protein-1-Dependent Mechanism

Chi-Yeon Park, Seung-Cheol Choi, Jong-Ho Kim, Ji-Hyun Choi, Hyung Joon Joo, Soon Jun Hong and Do-Sun Lim

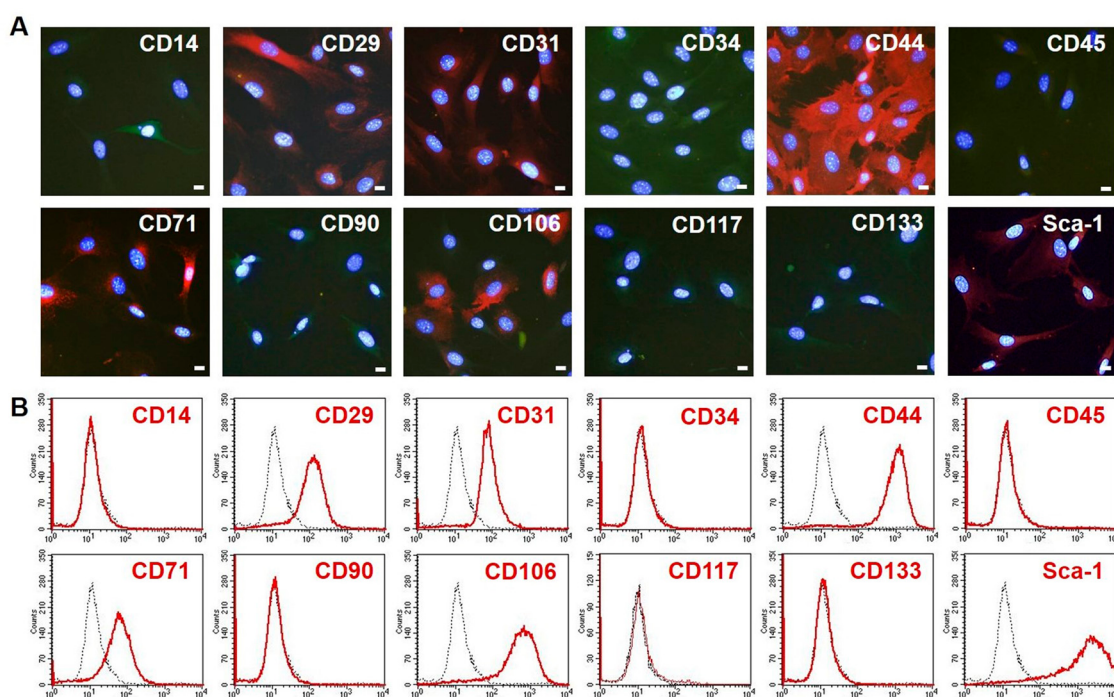

**Figure S1.** Phenotypic characterization of Sca-1+/CD31+ CSCs<sup>hTERT</sup>. Sca-1+/CD31+ CSCs<sup>hTERT</sup> were analyzed by immunostaining (A) and flow cytometry (B) with different cell surface antibodies. Scale bars = 20  $\mu$ m.

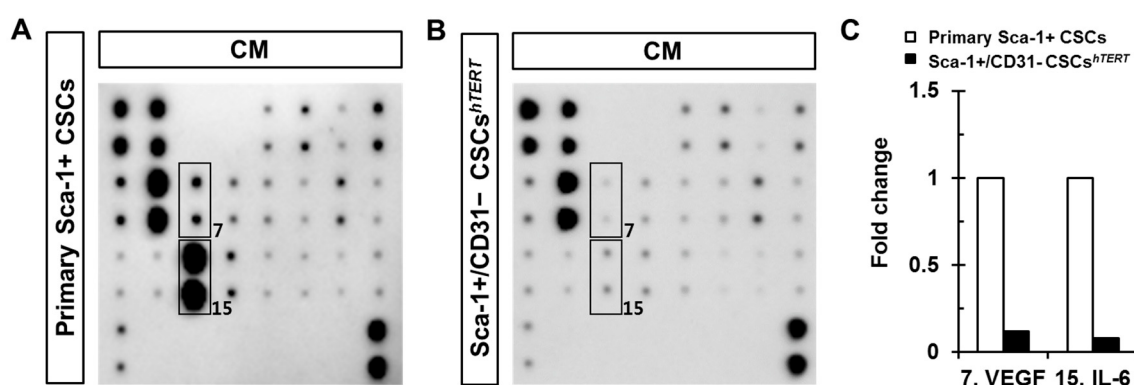

**Figure S2.** Comparison of paracrine factors secreted from primary Sca-1+ CSCs and Sca-1+/CD31- CSCs<sup>hTERT</sup>. (A) CMs secreted from primary Sca-1+ CSCs and Sca-1+/CD31- CSCs<sup>hTERT</sup> were subjected to a mouse cytokine antibody array detecting 21 cytokines in duplicate. Solid lined boxes indicate differentially secreted paracrine factors, VEGF (marked by number 7) and IL-6 (marked by number 15) between primary Sca-1+ CSCs (A) and Sca-1+/CD31- CSCs<sup>hTERT</sup> (B); (C) VEGF and IL-6 secreted from primary Sca-1+ CSCs and Sca-1+/CD31- CSCs<sup>hTERT</sup> were subjected to densitometry and are presented as fold changes for individual cytokines, taking primary Sca-1+ CSCs as a one-fold value.

**Table S1.** Selection of *hTERT*-immortalized Sca-1+ CSC lines by limiting dilution.

| Clone Number | Cell Number |       |       |       |       |        |
|--------------|-------------|-------|-------|-------|-------|--------|
|              | Day 1       | Day 5 | Day 6 | Day 7 | Day 8 | Day 12 |
| 1            | 1           | 2     | 3     | –     | –     | –      |
| 2            | 1           | 5     | 6     | 14    | 16    | 17     |
| 3            | 1           | 6     | 11    | 24    | 44    | >200   |
| 4            | 1           | 2     | 1     | 1     | –     | –      |
| 5            | 1           | 2     | 3     | 8     | 9     | –      |
| 6            | 1           | 1     | 1     | –     | –     | –      |
| 7            | 1           | 1     | 2     | 4     | 1     | –      |
| 8            | 1           | 11    | 19    | 30    | 51    | >200   |
| 9            | 1           | 2     | 1     | 1     | 1     | –      |
| 10           | 1           | 2     | 2     | 2     | 2     | 3      |
| 11           | 1           | 7     | 14    | 19    | 38    | 105    |
| 12           | 1           | 4     | 2     | –     | –     | –      |
| 13           | 1           | 5     | 10    | 32    | 50    | 29     |
| 14           | 1           | 4     | 3     | 3     | –     | –      |
| 15           | 1           | 3     | 9     | 4     | 2     | –      |
| 16           | 1           | 9     | 13    | 19    | 30    | 89     |
| 17           | 1           | 10    | 23    | 29    | 88    | >200   |
| 18           | 1           | 6     | 21    | 15    | 16    | –      |
| 19           | 1           | –     | –     | –     | –     | –      |
| 20           | 1           | 3     | 8     | 10    | 9     | 7      |
